# Supplementary material for: Zeolites featuring 14 × 12-ring channels with unique adsorption properties
Source: Royal Society of Chemistry journal article supplement (doi:10.1039/d1qi01171e), 2021-01-01
Supplement: d1qi01171e1.pdf [file d1qi01171e1.pdf]

## Supporting Materials

### Zeolites featuring 14×12-Ring Channels with Unique Adsorption Properties

Shiqing Li<sup>a</sup>, Lu Han<sup>b</sup>, Zhonglin Zhao<sup>a</sup>, Hao Xu<sup>a</sup>, Jingang Jiang<sup>\*a</sup>, Peng Wu<sup>\*a</sup>

<sup>a</sup> Shanghai Key Laboratory of Green Chemistry and Chemical Processes, School of Chemistry and Molecular Engineering, East China Normal University, 3663 North Zhongshan Rd., Shanghai, 200062, China.

<sup>b</sup> School of Chemical Science and Engineering, Tongji University, 1239 Siping Road, Shanghai, 200092, China.

KEYWORDS: PREFER, interlayer expansion, IEZ-FER(D4h), 4-membered ring unit

## Table of contents

|                  |    |
|------------------|----|
| Figure S1 .....  | 3  |
| Figure S2 .....  | 4  |
| Figure S3 .....  | 5  |
| Figure S4 .....  | 6  |
| Figure S5 .....  | 7  |
| Figure S6 .....  | 8  |
| Figure S7 .....  | 9  |
| Figure S8 .....  | 10 |
| Figure S9 .....  | 11 |
| Figure S10 ..... | 12 |
| Figure S11 ..... | 13 |
| Figure S12 ..... | 14 |
| Table S1 .....   | 15 |
| Table S2 .....   | 16 |
| Table S3 .....   | 17 |
| Table S4 .....   | 18 |
| Table S5 .....   | 19 |
| Table S6 .....   | 20 |

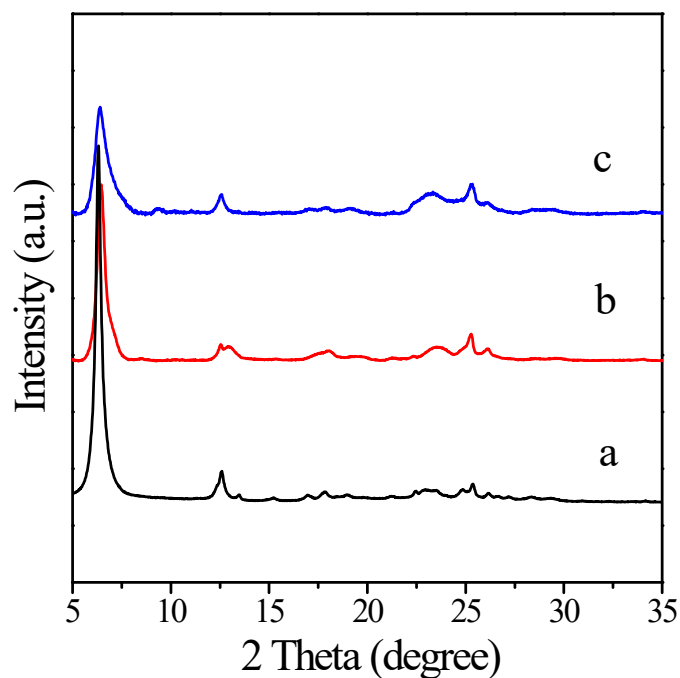

**Figure S1.** XRD patterns of IEZ-FER(D4h) (a), IEZ-FER(Si-Si) (b), IEZ-FER(Si-O-Si) (c).

*In the preparation of IEZ-FER(Si-Si) and IEZ-FER(Si-O-Si), PREFER was silylated with 1,2-dichlorotetramethyldisilane and 1,3-dimethyltetramethoxydisiloxane under low pH conditions, respectively. Typically, 0.5 g of the PREFER was mixed with 50 mL of 1 M HNO<sub>3</sub> solution and 0.14 g 1,2-dichlorotetramethyldisilane or 0.11 g 1,3-dimethyltetramethoxydisiloxane (about 0.6 mmol). The mixture was autoclaved at 443 K for 24 h under rotating (100 rpm). The silylated sample was washed with deionized water repeatedly and dried at 373 K for 10 h*

*Both IEZ-FER(Si-Si) and IEZ-FER(Si-O-Si) showed the same layer-related diffraction in low degree region with IEZ-FER(D4h), which indicated that this strategy is universal to organosilicon sources with different structures, but the sample silylated with D4h obviously exhibited a higher structure order. It may be caused by the differences in shape, quantity, presence and matching with the silicon hydroxyl group of organosilanes after being exchanged with OSDA to enter the layer.*

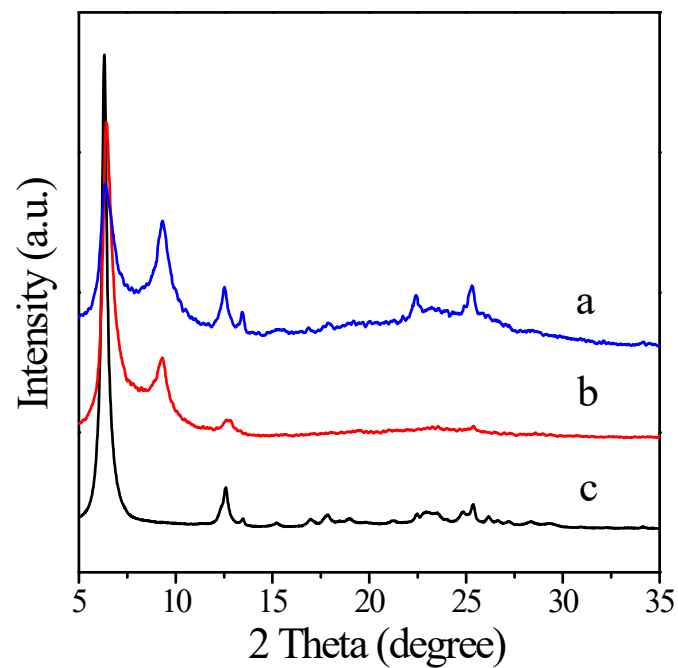

**Figure S2.** XRD patterns of IEZ-FER(D4h) synthesized at 403 K (a), 423 K (b), 443 K (c).

*The samples synthesized at 403 K and 423 K appeared the layer-related diffraction peak at a similar angle as 3D FER, which demonstrated that amount of silicon hydroxyl group of the layer could not be silylated with D4h regularly.*

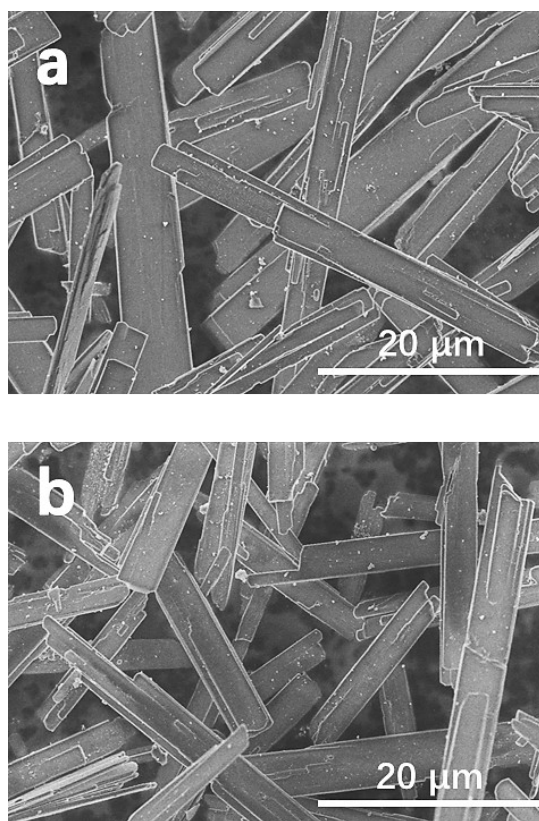

**Figure S3.** SEM images of PREFER (a), IEZ-FER(D4h) (b).

*The SEM images show that the interlayer-expanded material IEZ-FER(D4h) still preserved the sheet-like crystal morphology similar to that of pristine PREFER.*

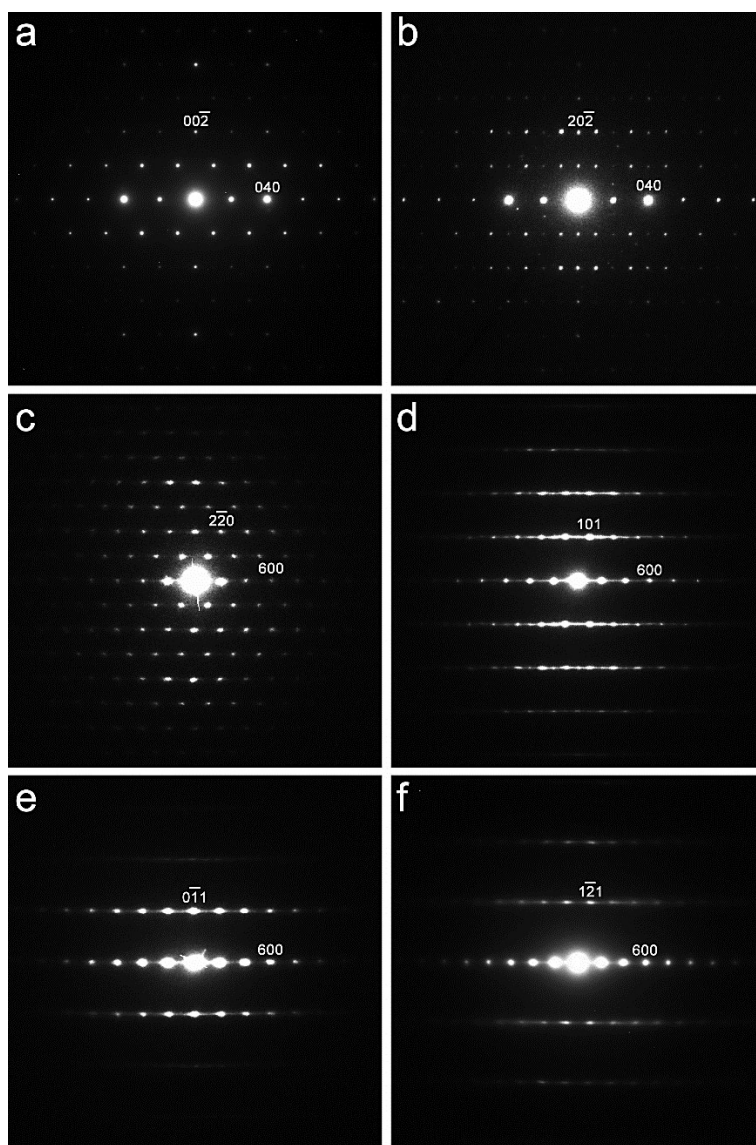

**Figure S4.** SAED patterns of IEZ-FER (D4h) taken along [100] (a), [101] (b), [001] (c), [010] (d), [011] (e) and [012] (f) directions.

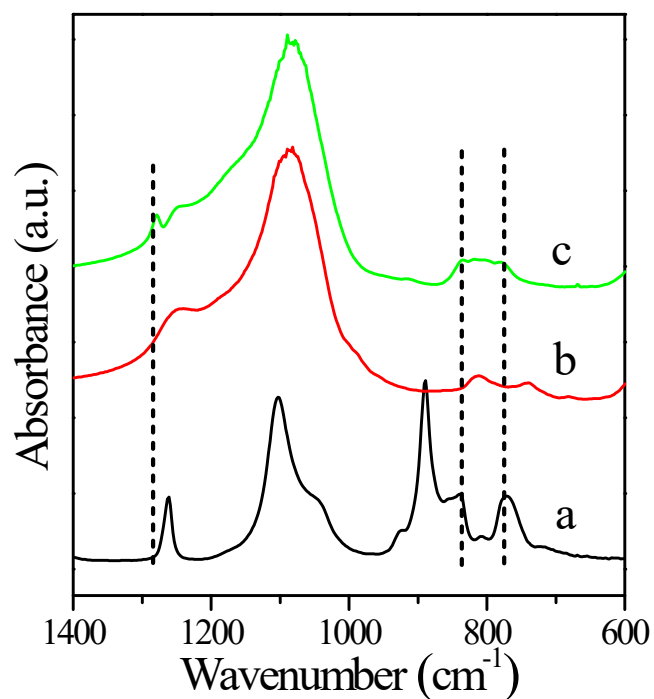

**Figure S5.** IR spectra of D4h silane (a), acid-treated PREFER in the absence of D4h (b), as-made IEZ-FER(D4h) by the silylation with 0.14 g D4h (c).

*It could not be verified that the 4MR has been inserted into the structure from the identification of the IR spectra because the characteristic absorption bands attributed to the 4MR overlap the bands ( $1000\text{--}1200\text{ cm}^{-1}$ ) arisen from the strong Si-O vibration of the framework for PREFER.*

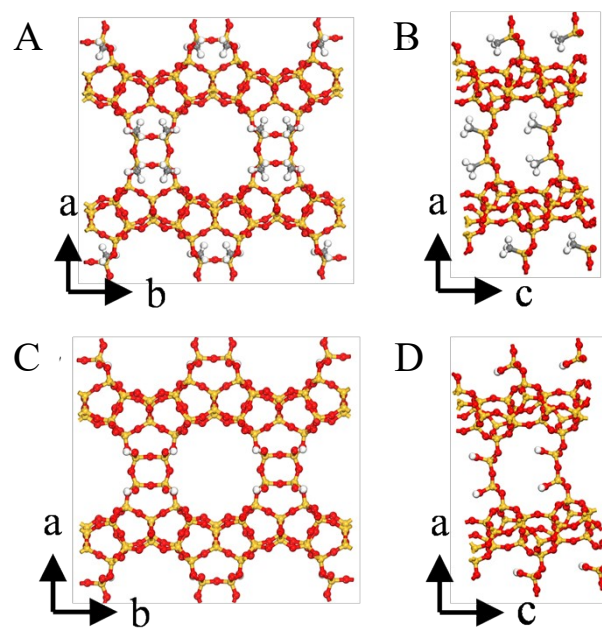

**Figure S6.** Structure model of as-made IEZ-FER(D4h) (A, B) and further calcined sample IEZ-FER(D4h-B) (C, D).

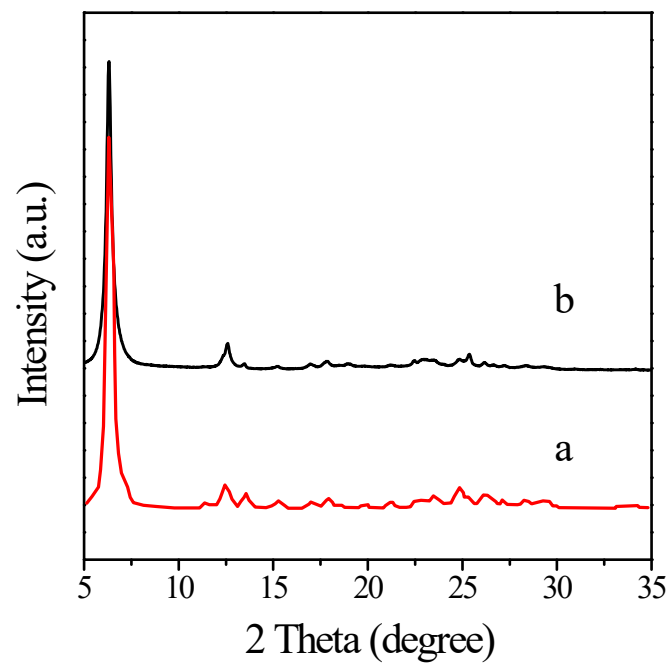

**Figure S7.** Simulated XRD pattern of ECNU-9 (a) and XRD pattern of IEZ-FER(D4h) (b).

*ECNU-9 and IEZ-FER(D4h) had analogous structure, as confirmed by the same XRD patterns.*

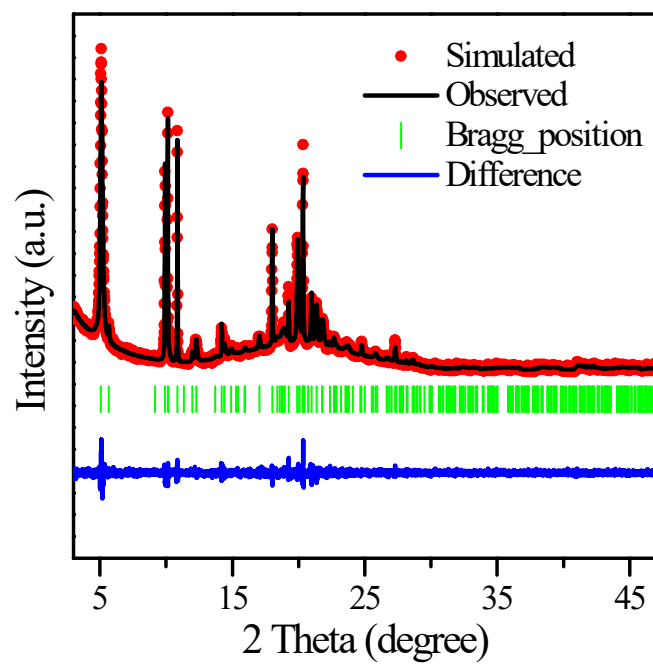

**Figure S8.** Pawley refinement of the x-ray diffraction pattern of IEZ-FER(D4h) ( $\lambda = 1.2438 \text{ \AA}$ ). (Rwp = 6.06%, Rwp(w/o bck) = 12.34%, Rp = 4.6%)

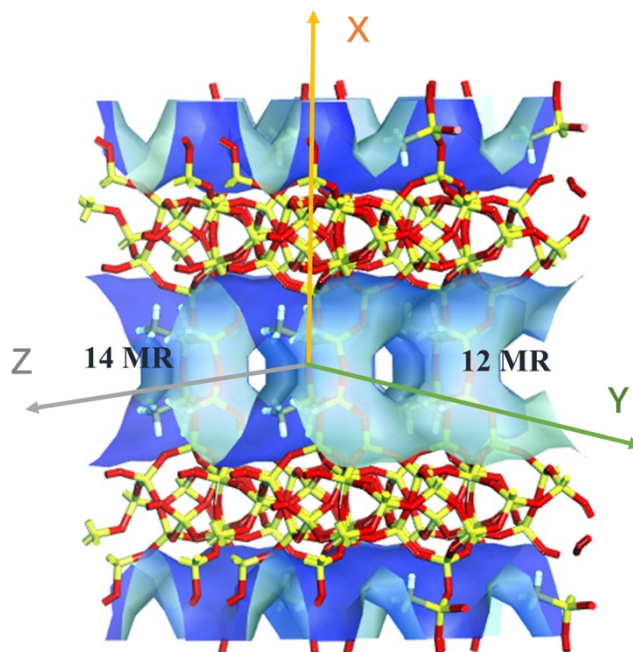

**Figure S9.** Schematic diagram of channel system for IEZ-FER(D4h).

*From its crystal structure, IEZ-FER(D4h) can be described as a two-dimensional framework comprising straight 12MR channels in one direction  $[010]$  and 14MR channels in one direction  $[001]$ .*

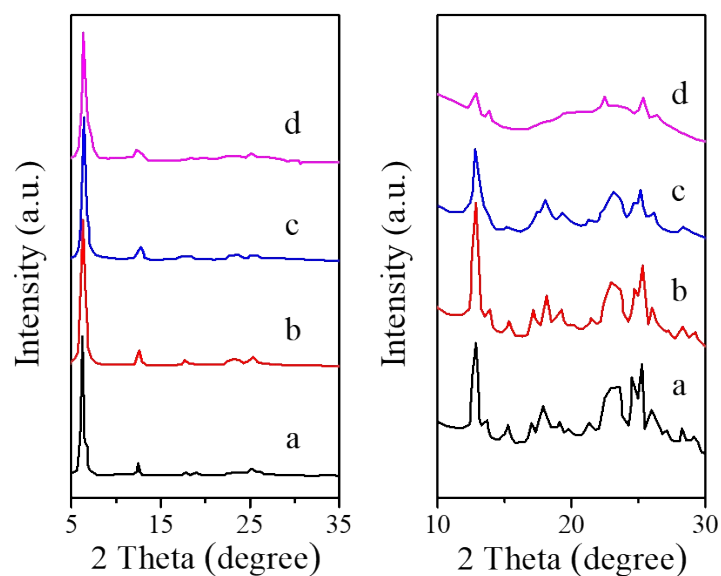

**Figure S10** XRD patterns of IEZ-FER(D4h) by the silylation with 0.14 g D4h (a), IEZ-FER(D4h) calcined at 723 K (b), IEZ-FER(D4h) calcined at 773 K (c), IEZ-FER (D4h) calcined at 823 K (d).

*XRD patterns investigated the thermal stability of IEZ-FER(D4h) after thermal treatment. No structural change was found when the temperature increased up to 723 K. Nevertheless, the temperature was higher than the 723 K, the crystal structure was gradually collapsed, and the interlayer spacing was slightly shrunk.*

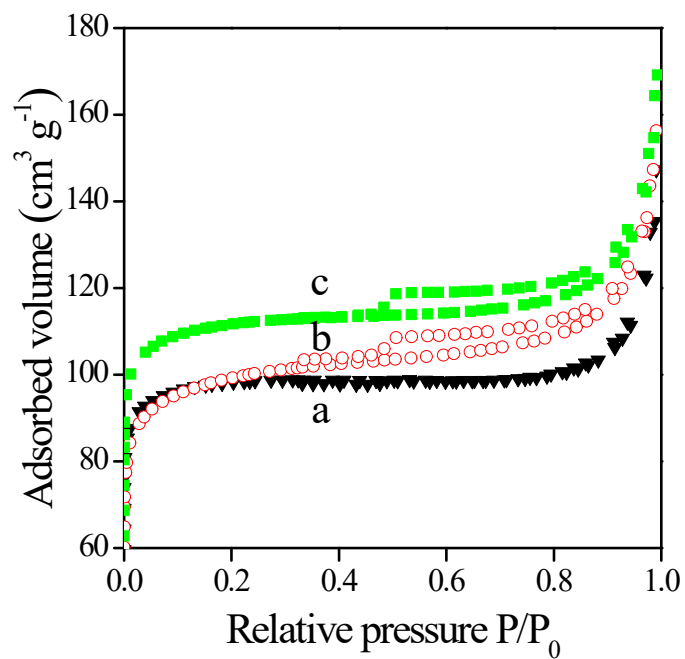

**Figure S11.** Nitrogen adsorption isotherms of 3D FER(▼ a), IEZ-FER(D4h) calcined at 723 K (○ b), IEZ-FER(D4h) calcined at 823 K (■ c).

*Compared with those of 3D FER and IEZ-FER(D4h) calcined at 723 K, the material calcined at 823 K has the largest surface area and micropore volume. That was to say, the D4h was inserted into the interlayer successfully, and the methyl groups block the micropore channels.*

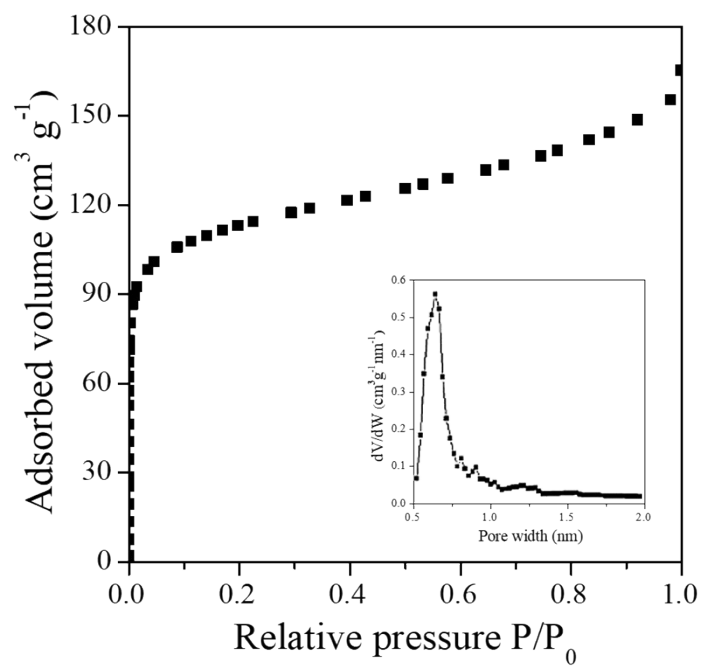

**Figure S12.** Argon adsorption isotherm and pore size distribution of IEZ-FER(D4h) calcined at 723 K.

*Ar gas adsorption results suggested that the average pore size of IEZ-FER(D4h) (6.0 Å), which is larger than that of 3D FER (3.9 Å).*

**Table S1.** Experimental Parameters and Pawley refinement results of IEZ-FER(D4h)

| Sample                                  | IEZ-FER(D4h-B)                   |
|-----------------------------------------|----------------------------------|
| condition of data collection            | Room temperature data collection |
| diffractometer                          | SSRF BL14B1                      |
| sample holder                           | capillary                        |
| wavelength [Å]                          | 1.2438                           |
| 2 $\theta$ range [°]                    | 3 – 48                           |
| step size [° 2 $\theta$ ]               | 0.01                             |
| number of points                        | 4499                             |
| total no of reflections                 | 279                              |
| FWHM [°]                                | 0.015 at 2 $\theta$ = 13.5°      |
| peak profile                            | Pseudo-Voigt                     |
| profile parameters                      | 14                               |
| $a$ [Å]                                 | 28.0285(39)                      |
| $b$ [Å]                                 | 14.0921(6)                       |
| $c$ [Å]                                 | 7.4395(3)                        |
| $\alpha$ [°]= $\beta$ [°]= $\gamma$ [°] | 90                               |
| space group                             | IMM2 (No. 44)                    |
| Rwp                                     | 6.06%                            |
| Rwp(w/o bck)                            | 12.34%                           |
| Rp                                      | 4.6%                             |

**Table S2.** Elemental Analysis Data for Various Materials

| Sample           | D4h (g) | C (%)  | H (%)  | N (%)  | C/N ratio | n(D4h) / n([Si <sub>36</sub> O <sub>72</sub> ]) |
|------------------|---------|--------|--------|--------|-----------|-------------------------------------------------|
| PREFER           | -       | 13.69  | 3.088  | 2.702  | 5.91      | -                                               |
| IEZ-FER(0.07D4h) | 0.07    | 4.4105 | 0.255  | 0.1375 | 37.42     | 1.8                                             |
| IEZ-FER(0.14D4h) | 0.14    | 4.1105 | 0.2385 | 0.077  | 62.28     | 1.9                                             |
| IEZ-FER(0.28D4h) | 0.28    | 7.177  | 0.7905 | 0.133  | 62.96     | 3.3                                             |

*The CHN elemental analyses were used to determine the D4h addition amount. The ratio of  $n(\text{D4h})/n([\text{Si}_{36}\text{O}_{72}])$  can be obtained from the amount of nitrogen, carbon and crystal-cell used for silylation. It can be found that when the D4h amount was 0.14 g, the ratio was near to the theoretical value (2.0). So, the D4h (0.14 g) was reasonable for completing the silylation.*

**Table S3.** Unit Cell Parameters of Various Materials

| Sample      | Unit-cell parameter (Å)        | Sample       | Unit-cell parameter (Å)        |
|-------------|--------------------------------|--------------|--------------------------------|
| 3DFER       | a =18.6972                     | PREFER       | a=26.3971                      |
|             | b=14.0790                      |              | b=13.9954                      |
|             | c=7.4800                       |              | c=7.4616                       |
|             | $\alpha=\beta=\gamma=90^\circ$ |              | $\alpha=\beta=\gamma=90^\circ$ |
| IEZ-FER(Si) | a=24.0476                      | IEZ-FER(D4h) | a=28.0285                      |
|             | b=14.1893                      |              | b=14.0921                      |
|             | c=7.4785                       |              | c=7.4395                       |
|             | $\alpha=\beta=\gamma=90^\circ$ |              | $\alpha=\beta=\gamma=90^\circ$ |

**Table S4.** Relative Intensity Ratios of Q<sup>4</sup>, Q<sup>3</sup>, and T<sup>3</sup> Resonances Estimated by Deconvolution of <sup>29</sup>Si MAS NMR Spectra

| Sample                            | Q <sup>2</sup> | Q <sup>3</sup> | Q <sup>4</sup> | T <sup>3</sup> | Q <sup>3</sup> /Q | T/(Q+T) |
|-----------------------------------|----------------|----------------|----------------|----------------|-------------------|---------|
| PREFER                            | -              | 30.82          | 69.18          | -              | 30.82             | -       |
| IEZ-FER(D4h)                      | -              | 8.04           | 71.85          | 20.1           | 10.06             | 20.1    |
| IEZ-FER(D4h)<br>calcined at 723 K | -              | 8.11           | 73.14          | 18.75          | -                 | -       |
| IEZ-FER(D4h)<br>calcined at 823 K | 0.71           | 30.5           | 66.14          | 2.64           | -                 | -       |

**Table S5.** Coordination Sequences and Vertex Symbols

| T-atom Name    |   | N <sub>1</sub> to N <sub>10</sub> |    |    |    |    |    |     |     |     | Vertex Symbol         |
|----------------|---|-----------------------------------|----|----|----|----|----|-----|-----|-----|-----------------------|
| T <sub>1</sub> | 4 | 11                                | 20 | 31 | 48 | 70 | 92 | 130 | 162 | 188 | [5.5(2).5.12.5.12]    |
| T <sub>2</sub> | 3 | 6                                 | 14 | 30 | 51 | 70 | 89 | 116 | 154 | 200 | [4.5.12(2)]           |
| T <sub>3</sub> | 4 | 12                                | 20 | 30 | 43 | 65 | 96 | 129 | 161 | 192 | [5.5.5.5(2).5.12]     |
| T <sub>4</sub> | 4 | 12                                | 20 | 30 | 43 | 65 | 96 | 129 | 161 | 192 | [5.5.5.5(2).5.12]     |
| T <sub>5</sub> | 4 | 12                                | 20 | 38 | 45 | 64 | 98 | 128 | 163 | 192 | [5.5.5.5.5.5(2)]      |
| T <sub>6</sub> | 4 | 12                                | 20 | 30 | 42 | 61 | 95 | 138 | 159 | 187 | [5.5(2).5.5(2).14(2)] |
| T <sub>7</sub> | 4 | 12                                | 20 | 30 | 42 | 61 | 95 | 138 | 159 | 187 | [5.5(2).5.5(2).14(2)] |

**Table S6.** Mean Textural Properties of IEZ-FER(D4h)

| Sample                    | $S_{\text{BET}}$ ( $\text{m}^2 \text{g}^{-1}$ ) | $V_{\text{tot}}$ ( $\text{cm}^3 \text{g}^{-1}$ ) | Pore diameter ( $\text{\AA}$ ) |
|---------------------------|-------------------------------------------------|--------------------------------------------------|--------------------------------|
| 3D FER                    | 375                                             | 0.224                                            | 3.9                            |
| IEZ-FER(D4h) <sup>a</sup> | 378                                             | 0.239                                            | 6                              |
| IEZ-FER(D4h) <sup>b</sup> | 434                                             | 0.252                                            | -                              |

<sup>a</sup> The material was calcined at 723 K.<sup>b</sup> The material was calcined at 823 K.
